# Supplementary material
Source: bioRxiv or medRxiv preprint supplement (https://medrxiv.org/highwire/filestream/92612/field_highwire_adjunct_files/0/2020.08.08.20170787-1.pdf)
Supplement: Supplementary file [file 2020.08.08.20170787-1.pdf]

## APPENDIX

### Table of Contents

**eTable 1:** Complications during hospital course for hospitalized COVID-19 patients.

**eTable 2:** Logistic regression models and odds ratios for intubation.

**eTable 3:** Logistic regression models and odds ratios for in-patient mortality.

**eTable 4:** Cox regression models and hazard ratios for 30-day mortality.

**eTable 5:** MDOC COVID-19 Acuity Scoring system to determine eligibility for transfer from prisoner facility to the hospital.

**Comparative Clinical Outcomes and Mortality in Prisoner and Non-Prisoner Populations  
Hospitalized with Covid-19**

Ahmed M. Altibi,<sup>1,2</sup> MD; Bhargava Pallavi,<sup>3</sup> MD; Hassan Liaqat,<sup>1</sup> MD; Alexander A. Slota,<sup>1</sup> MD; Radhika Sheth,<sup>1</sup> MD; Lama Al Jebbawi,<sup>1</sup> MD; Matthew E. George,<sup>4</sup> MD; Allison LeDuc,<sup>1</sup> PA-C; Enas Abdallah,<sup>1</sup> MD; Luke R. Russel,<sup>1</sup> DO; Saniya Jain,<sup>5</sup> MS; Nariné Shirvanian,<sup>1</sup> DO; Ahmad Masri,<sup>6</sup> MD, MS; Vivek Kak,<sup>1†</sup> MD

**Affiliations:**

1 Henry Ford Allegiance Hospital, Henry Ford Health System, Jackson, MI, USA.

2 Harvard T.H. Chan School of Public Health, Harvard University, Boston, MA, USA.

3 Department of Internal Medicine, Division of Infectious Diseases, Henry Ford Hospital, Detroit and West Bloomfield, MI, USA.

4 Division of Hospital Medicine, Henry Ford West Bloomfield Hospital, West Bloomfield, MI, USA.

5 Michigan State University College of Osteopathic Medicine, Lansing, MI, USA.

6 Knight Cardiovascular Institute, Oregon Health & Science University, Portland, OR, USA.

**† Corresponding Author**

**Vivek Kak, M.D., FACP**

Department of Internal Medicine

Henry Ford Allegiance Hospital

Henry Ford Health System

205 N East Ave, Jackson, MI 49201 USA

Tel: +1-517-927-3248

Email: [Vkak1@hfhs.org](mailto:Vkak1@hfhs.org)

**eTable 1: Complications during hospital course for hospitalized COVID-19 patients (n= 706).**

|                                         | <b>Prisoners<br/>(N= 108)</b> | <b>Non-prisoners<br/>(N= 598)</b> |
|-----------------------------------------|-------------------------------|-----------------------------------|
| <b>ARDS<sup>‡</sup></b>                 | 40 (37.0%)                    | 176 (29.4%)                       |
| <b>Pulmonary embolism<sup>†</sup></b>   | 7 (6.5%)                      | 32 (5.4%)                         |
| <b>Deep venous thrombosis</b>           | 7 (6.5%)                      | 0 (0.0%)                          |
| <b>Acute kidney injury<sup>‡</sup></b>  | 49 (45.4%)                    | 247 (41.3%)                       |
| <b>Rhabdomyolysis</b>                   | 29 (26.9%)                    | 57 (9.5%)                         |
| <b>Ischemic Stroke</b>                  | 3 (2.8%)                      | 6 (1.0%)                          |
| <b>Myocardial infarction</b>            | 2 (1.9%)                      | 4 (0.7%)                          |
| <b>Acute encephalopathy</b>             | 4 (3.7%)                      | 29 (4.9%)                         |
| <b>Septic shock</b>                     | 17 (15.7%)                    | 37 (6.2%)                         |
| <b>Bacteremia<sup>¶</sup></b>           | 2/30 (6.7%)                   | 22/320 (6.9%)                     |
| <b>Bacterial Pneumonia<sup>  </sup></b> | 8/21 (38.1%)                  | 25/88 (28.4%)                     |
| <b>Influenza A/B</b>                    | 0/3 (0.0%)                    | 3/151 (2.0%)                      |

<sup>†</sup> Only pulmonary embolism cases confirmed with imaging modalities (e.g., computed tomography scan) were counted. Suspected pulmonary embolism cases, treated empirically, without a confirmatory diagnosis were not included.

<sup>‡</sup> Acute respiratory distress syndrome (ARDS) was defined in accordance with the Berlin Criteria for ARDS. Acute kidney injury was defined in accordance to KIDGO criteria for acute kidney injury.

<sup>¶</sup> Blood cultures were obtained in 350 of 706 included patients. Isolated organisms from blood cultures were: staphylococcus aureus (n=7), staphylococcus epidermis (n=5), Corynebacterium (n=5), enterococcus fecalis (n=3), streptococcal species (n=2), and others (n=3). Invasive candidemia was diagnosed in one patient from the non-prisoner group.

<sup>||</sup> Superimposed bacterial pneumonia is confirmed with sputum or tracheal aspirate cultures, which were obtained in a total of 109 patients (21 prisoners and 88 non-prisoners). Bacterial pathogens isolated from sputum/tracheal aspirate cultures were: staphylococcus aureus (n= 16), pseudomonas aeruginosa (n= 12), Escherichia coli (n= 3), klebsiella pneumonia (n= 3), streptococcus pneumonia (n=1) and others (n=9). In addition, candidal species grew in obtained cultures in 6 patients.

**eTable 2: Logistic regression models and odds ratios for intubation in hospitalized COVID-19 patients (n= 706).**

|                                     | <b>Model 1</b>             | <b>Model 2</b>              | <b>Model 3</b>              | <b>Model 4</b>             |
|-------------------------------------|----------------------------|-----------------------------|-----------------------------|----------------------------|
| <b>Prisoners vs. non-prisoners</b>  | 1.86 (1.14-3.03), p= 0.010 | 1.64 (0.96-2.80), p= 0.070  | 1.66 (0.96-2.87), p= 0.070  | 1.16 (0.63-2.14), p= 0.640 |
| <b>Age, in 1 year-units</b>         |                            | 1.01 (0.996-1.02), p= 0.200 | 1.01 (0.997-1.03), p= 0.120 | 1.00 (0.98-1.02), p= 0.870 |
| <b>Sex: male vs. female</b>         |                            | 1.50 (0.96-2.35), p= 0.080  | 1.58 (1.00-2.49), p= 0.050  | 1.24 (0.74-2.06), p= 0.410 |
| <b>Race: Caucasian vs. others</b>   |                            |                             | 1.01 (0.66-1.53), p= 0.980  | 1.12 (0.71-1.77), p= 0.640 |
| <b>CCI Score</b>                    |                            |                             | 1.12 (1.01-1.25), p= 0.040  | 1.11 (0.99-1.26), p= 0.090 |
| <b>Obesity: yes or no</b>           |                            |                             | 2.05 (1.33-3.16), p= 0.001  | 1.71 (1.07-2.73), p= 0.030 |
| <b>Respiratory rate &gt;24/min</b>  |                            |                             |                             | 2.86 (1.82-4.49), p <0.001 |
| <b>Lymphocytes &lt;1000/ul</b>      |                            |                             |                             | 1.29 (0.80-2.08), p= 0.290 |
| <b>Platelets &lt;150,000/ul</b>     |                            |                             |                             | 1.31 (0.79-2.19), p= 0.300 |
| <b>Creatinine &gt;1.5 mg/dl</b>     |                            |                             |                             | 0.63 (0.36-1.11), p= 0.110 |
| <b>AST &gt;40 U/liter</b>           |                            |                             |                             | 1.23 (0.74-2.02), p= 0.430 |
| <b>LDH &gt;250 U/liter</b>          |                            |                             |                             | 1.57 (0.85-2.90), p= 0.150 |
| <b>CRP &gt;5 mg/dl</b>              |                            |                             |                             | 2.35 (1.18-4.65), p= 0.020 |
| <b>Ferritin ≥2000 ng/ml</b>         |                            |                             |                             | 1.65 (0.86-3.16), p= 0.130 |
| <b>Procalcitonin &gt;0.25 ng/ml</b> |                            |                             |                             | 2.54 (1.51-4.27), p <0.001 |
| <b>D-dimer &gt;250 ng/ml</b>        |                            |                             |                             | 0.70 (0.32-1.59), p= 0.400 |

\* Results of the logistic regression models are reported as odds ratios (95% Confidence Interval), p-value. Model 1 is unadjusted imprisonment status-only model; Model 2 is adjusted for age and sex; Model 3 is adjusted for age, sex, race, Charlson Comorbidity Index (CCI) score, and obesity (BMI ≥30 kg/m<sup>2</sup>); model 4 is adjusted for age, sex, race, CCI score, obesity, respiratory rate (>24/minute), lymphopenia (lymphocyte count <1,000/ul), thrombocytopenia (platelet count <150,000/ul), creatinine >1.5 mg/dl, AST >40 U/liter, lactate dehydrogenase (LDH) >250 U/liter, c-reactive protein (CRP) >5 mg/dl, ferritin ≥2,000 ng/ml, procalcitonin >0.25 ng/ml, and d-dimer >500 ng/ml. Multiple imputation was used to estimate missing values. Imputed variables are: race (15 values), BMI (3 values), lymphocyte count (4 values), platelet count (4 values), creatinine (6 values), AST (28 values), LDH (39 values), CRP (41 values), ferritin (31 values), procalcitonin (68 values), and d-dimer (49 values).

**eTable 3: Logistic regression models and odds ratios for in-hospital mortality in hospitalized COVID-19 patients (n= 706).**

|                                     | <b>Model 1</b>             | <b>Model 2</b>             | <b>Model 3</b>             | <b>Model 4</b>             |
|-------------------------------------|----------------------------|----------------------------|----------------------------|----------------------------|
| <b>Prisoners vs. non-prisoners</b>  | 1.68 (1.06-2.65), p= 0.030 | 2.38 (1.37-4.12), p= 0.002 | 2.32 (1.33-4.05), p= 0.003 | 1.95 (1.07-3.57), p= 0.030 |
| <b>Age, in 1 year-units</b>         |                            | 1.07 (1.06-1.09), p <0.001 | 1.07 (1.05-1.09), p <0.001 | 1.06 (1.04-1.09), p <0.001 |
| <b>Sex: male vs. female</b>         |                            | 1.94 (1.25-3.0), p= 0.003  | 1.89 (1.21-2.95), p= 0.005 | 1.65 (1.01-2.68), p= 0.046 |
| <b>Race: Caucasian vs. others</b>   |                            |                            | 1.47 (0.97-2.24), p= 0.070 | 1.69 (1.08-2.62), p= 0.020 |
| <b>CCI Score</b>                    |                            |                            | 1.16 (1.04-1.29), p= 0.006 | 1.13 (1.01-1.26), p= 0.040 |
| <b>Obesity: yes or no</b>           |                            |                            | 1.18 (0.76-1.82), p= 0.470 | 0.98 (0.62-1.56), p= 0.930 |
| <b>Respiratory rate &gt;24/min</b>  |                            |                            |                            | 2.06 (1.32-3.20), p= 0.001 |
| <b>Lymphocytes &lt;1000/ul</b>      |                            |                            |                            | 1.04 (0.67-1.64), p= 0.850 |
| <b>Platelets &lt;150,000/ul</b>     |                            |                            |                            | 1.29 (0.80-2.09), p= 0.300 |
| <b>Creatinine &gt;1.5 mg/dl</b>     |                            |                            |                            | 1.14 (0.69-1.86), p =0.610 |
| <b>AST &gt;40 U/liter</b>           |                            |                            |                            | 0.87 (0.54-1.41), p= 0.580 |
| <b>LDH &gt;250 U/liter</b>          |                            |                            |                            | 1.80 (1.03-3.15), p= 0.040 |
| <b>CRP &gt;5 mg/dl</b>              |                            |                            |                            | 1.66 (0.92-2.99), p= 0.090 |
| <b>Ferritin ≥2000 ng/ml</b>         |                            |                            |                            | 1.07 (0.53-2.17), p= 0.840 |
| <b>Procalcitonin &gt;0.25 ng/ml</b> |                            |                            |                            | 2.10 (1.28-3.46), p= 0.004 |
| <b>D-dimer &gt;250 ng/ml</b>        |                            |                            |                            | 1.25 (0.50-3.13), p= 0.640 |

\* Results of the logistic regression models are reported as odds ratios (95% Confidence Interval), p-value. Model 1 is unadjusted imprisonment status-only model; Model 2 is adjusted for age and sex; Model 3 is adjusted for age, sex, race, Charlson Comorbidity Index (CCI) score, and obesity (BMI ≥30 kg/m<sup>2</sup>); model 4 is adjusted for age, sex, race, CCI score, obesity, respiratory rate (>24/minute), lymphopenia (lymphocyte count <1,000/ul), thrombocytopenia (platelet count <150,000/ul), creatinine >1.5 mg/dl, AST >40 U/liter, lactate dehydrogenase (LDH) >250 U/liter, c-reactive protein (CRP) >5 mg/dl, ferritin ≥2,000 ng/ml, procalcitonin >0.25 ng/ml, and d-dimer >500 ng/ml. Multiple imputation was used to estimate missing values. Imputed variables are: race (15 values), BMI (3 values), lymphocyte count (4 values), platelet count (4 values), creatinine (6 values), AST (28 values), LDH (39 values), CRP (41 values), ferritin (31 values), procalcitonin (68 values), and d-dimer (49 values).

**eTable 4: Cox regression models and hazard ratios for 30-day mortality in hospitalized COVID-19 patients (n= 697).**

|                                     | <b>Model 1</b>             | <b>Model 2</b>             | <b>Model 3</b>             | <b>Model 4</b>              |
|-------------------------------------|----------------------------|----------------------------|----------------------------|-----------------------------|
| <b>Prisoners vs. non-prisoners</b>  | 1.41 (0.98-2.03), p= 0.060 | 1.96 (1.32-2.93), p= 0.001 | 2.00 (1.33-3.00), p= 0.001 | 1.92 (1.24-2.98), p= 0.004  |
| <b>Age, in 1 year-units</b>         |                            | 1.08 (1.06-1.09), p <0.001 | 1.07 (1.06-1.09), p <0.001 | 1.07 (1.06-1.09), p <0.001  |
| <b>Sex: male vs. female</b>         |                            | 1.75 (1.25-2.44), p= 0.001 | 1.64 (1.17-2.30), p= 0.004 | 1.40 (0.98-2.00), p <0.001  |
| <b>Race: Caucasian vs. others</b>   |                            |                            | 1.43 (1.04-1.96), p= 0.030 | 1.59 (1.15-2.19), p= 0.005  |
| <b>CCI Score</b>                    |                            |                            | 1.15 (1.07-1.23), p <0.001 | 1.13 (1.05-1.22), p= 0.002  |
| <b>Obesity: yes or no</b>           |                            |                            | 1.03 (0.74-1.45), p= 0.850 | 0.89 (0.62-1.26), p= 0.500  |
| <b>Respiratory rate &gt;24/min</b>  |                            |                            |                            | 1.69 (1.24-2.33), p= 0.001  |
| <b>Lymphocytes &lt;1000/ul</b>      |                            |                            |                            | 1.12 (0.81-1.55), p= 0.480  |
| <b>Platelets &lt;150,000/ul</b>     |                            |                            |                            | 1.21 (0.87-1.68), p= 0.250  |
| <b>Creatinine &gt;1.5 mg/dl</b>     |                            |                            |                            | 1.25 (0.89-1.78), p= 0.200  |
| <b>AST &gt;40 U/liter</b>           |                            |                            |                            | 0.85 (0.60-1.22), p= 0.380  |
| <b>LDH &gt;250 U/liter</b>          |                            |                            |                            | 1.65 (1.10-2.47), p= 0.020  |
| <b>CRP &gt;5 mg/dl</b>              |                            |                            |                            | 1.28 (0.84-1.94), p= 0.260  |
| <b>Ferritin ≥2000 ng/ml</b>         |                            |                            |                            | 0.97 (0.59-1.60), p= 0.920  |
| <b>Procalcitonin &gt;0.25 ng/ml</b> |                            |                            |                            | 1.44 (0.998-2.09), p= 0.050 |
| <b>D-dimer &gt;250 ng/ml</b>        |                            |                            |                            | 1.35 (0.62-2.97), p= 0.450  |

\* Results of the Cox regression models are reported as hazard ratios (95% Confidence Interval), p-value. Model 1 is unadjusted imprisonment status-only model; Model 2 is adjusted for age and sex; Model 3 is adjusted for age, sex, race, Charlson Comorbidity Index (CCI) score, and obesity (BMI ≥30 kg/m<sup>2</sup>); model 4 is adjusted for age, sex, race, CCI score, obesity, respiratory rate (>24/minute), lymphopenia (lymphocyte count <1,000/ul), thrombocytopenia (platelet count <150,000/ul), creatinine >1.5 mg/dl, AST >40 U/liter, lactate dehydrogenase (LDH) >250 U/liter, c-reactive protein (CRP) >5 mg/dl, ferritin ≥2,000 ng/ml, procalcitonin >0.25 ng/ml, and d-dimer >500 ng/ml. Multiple imputation was used to estimate missing values. Imputed variables are: race (15 values), BMI (3 values), lymphocyte count (4 values), platelet count (4 values), creatinine (6 values), AST (28 values), LDH (39 values), CRP (41 values), ferritin (31 values), procalcitonin (68 values), and d-dimer (49 values).

**eTable 5: MDOC COVID-19 Acuity Score. Acuity pre-hospital scoring system adopted by Michigan Department of Correction (MDOC), to determine eligibility for transfer of COVID-19 prisoners from the prisoner facility to the hospital.**

| COVID-19 PATIENT ASSESSMENT                                  |       |        |           |              |           |         |         |        |
|--------------------------------------------------------------|-------|--------|-----------|--------------|-----------|---------|---------|--------|
| Parameters                                                   | 3*    | 2      | 1         | 0            | 1         | 2       | 3*      | POINTS |
| Age                                                          |       |        |           | <65          |           |         | ≥65     |        |
| Respiratory Rate                                             | ≤8    |        | 9-11      | 12-20        |           | 21-24   | ≥25     |        |
| Heart Rate                                                   | ≤40   |        | 41-50     | 51-90        | 91-110    | 111-130 | >131    |        |
| Temperature (Oral-F)                                         | ≤35.0 |        | 35.1-36.0 | 36.1-38.0    | 38.1-39.0 | ≥39.1   |         |        |
| Systolic Blood Pressure (optional if 0 points on other data) | ≤90   | 91-100 |           | 101-159      |           | 160-179 | ≥180    |        |
| Oxygen Saturation – Room Air (after >1-minute walking)       | <92*  | 92-93  | 94-95     | 96+          |           |         |         |        |
| Pre-COVID-19 Chronic Supplemental Oxygen                     |       | Yes    |           | No           |           |         |         |        |
| Mental Status                                                |       |        |           | Normal/Alert |           |         | Altered |        |
| <b>TOTAL POINT SCORE</b>                                     |       |        |           |              |           |         |         |        |

¶ Full score is obtained at least once daily for score 0, and twice daily for score 1-4. Provider was contacted immediately for consideration of transfer to the hospital, if any of the following: oxygen saturation on room air (after >1-minute walking/physical activity) <92%, oxygen requirement is now >2 liter/minute above pre Covid-19 baseline, or patient has three (3) or more points on the scoring system at any measurement (unless the three points are based on age alone).

|| Transfer from the prisoner facility to the hospital does not necessarily translate into an admission to the hospital but indicates the need for further evaluation by the emergency department at the hospital to further assess eligibility for admission.
